# Supplementary material
Source: PubMed Central journal article supplement (PMC4743672)
Supplement: NIHMS755668-supplement-01.pdf [file NIHMS755668-supplement-01.pdf]

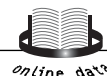

## SUPPLEMENTARY ONLINE DATA

# Holocarboxylase synthetase interacts physically with nuclear receptor co-repressor, histone deacetylase 1 and a novel splicing variant of histone deacetylase 1 to repress repeats

Dandan LIU\* and Janos ZEMPLENI\*<sup>1</sup>

\*Department of Nutrition and Health Sciences, Ruth Leverton Hall, University of Nebraska-Lincoln, Lincoln, NE 68583-0806, U.S.A.

Supplementary Table S1 can be found on the next page.

<sup>1</sup> To whom correspondence should be addressed (email JZEMPLENI2@UNL.EDU).

**Table S1 PCR primers used in the present study**

GenBank® entries: CDK3 = cyclin-dependent kinase 3 (NM\_001261); Chr1alpha = chromosome 1 alpha satellite repeats (M26919); Chr4alpha = chromosome 4 alpha satellite repeats (M38467); GAPDH = glyceraldehyde-3-phosphate dehydrogenase (NG\_007073 for genomic DNA and NM\_002046 for complementary DNA); HDAC1 = histone deacetylase 1 (NM\_004964); HLCS = holocarboxylase synthetase (NM\_000411); LTR15 = intact LTR (AC116309); LTR22 = solitary LTR (AL451165); MDM2 = E3 ubiquitin-protein ligase MDM2 (NM\_002392); N-CoR = nuclear receptor corepressor (NM\_006311); TP53 = tumour protein p53 (NM\_000546). F, forward; gDNA, genomic DNA; P, primer pair; R, reverse; R-U5 = region between R and U5 of LTR of HERV-K families; U5 = U5 region of LTR of HERV-K families.

| P  | Target; template            | Primer sequences 5→3'                                                 | F/R    |
|----|-----------------------------|-----------------------------------------------------------------------|--------|
| 1  | HLCS-NT; cDNA               | GCCGAATCCCATGGAAGATAGACTCC<br>CAGGTCGACCCGAAGGCTCCATGTTG              | F<br>R |
| 2  | HLCS-CD; cDNA               | GCCGAATCCCTTTGCCAAGTGACCC<br>CAGGTCGACCCGTCACGTGTAATAATA              | F<br>R |
| 3  | HLCS-L; cDNA                | GCCGAATCCCACCATCTGCATCAACG<br>CAGGTCGACCCGTGGACCCAGTATCGG             | F<br>R |
| 4  | HLCS-CT; cDNA               | GCCGAATCACAGTGGTCAGCAAGTCC<br>CAGGTCGACTCTCAGCATGTCCGAAGGA            | F<br>R |
| 5  | HLCS; cDNA                  | GTCCGAATTCGGGAGCATGTTGGCAGAG<br>ATTTCTCGAGCCCGCTTTGGGGAG              | F<br>R |
| 6  | N-CoR-NT; cDNA              | GCGGAATCCCTCAAGTTCAGGTTATCCT<br>GCGGGTACCATCCAAGTCTCTTTCTTTGG         | F<br>R |
| 7  | N-CoR-CD; cDNA              | GCGGAATCCCACCAAAGTCTGACTCTGT<br>GCGGGTACAGCACTTGCAGCAGCTGC            | F<br>R |
| 8  | N-CoR-CT; cDNA              | GCGGAATCCCTGGTACACAGATTACTTT<br>GCGGGTACCGTTCATCACTATCCGACAGG         | F<br>R |
| 9  | CT <sub>K2323R</sub> ; cDNA | TCAGGAGGAGTTTGCAGACCAAAGTGTATCAGC<br>TTTGGTCTGCAAACCTCTCTGAATGAGGTGAT | F<br>R |
| 10 | CT <sub>K2325R</sub> ; cDNA | GGAGTTTGCAAACCAAGGCTGATCAGCAAGTCA<br>ATCAGCCTTGTTTGCAAACTCCTCTGAATGA  | F<br>R |
| 11 | CT <sub>del</sub> ; cDNA    | CCATCACCTCATTCAAGCAAGTCAAACAGC<br>TGCTTGAATGAGGTGATGGGTCCCTTCCT       | F<br>R |
| 12 | N-CoR-NT; cDNA              | GCGGAATCTCAAGTTCAGGTTATCCTCC<br>GCGGAGCTCATCCAAGTCTCTTTCTTTGG         | F<br>R |
| 13 | N-CoR-CD; cDNA              | GCGGAATCACCAAAGTCTGACTCTGTGG<br>GCGGAGCTCAGCACTTGCAGCAGCTGC           | F<br>R |
| 14 | N-CoR-CT; cDNA              | GCGGAATCCCTGGTACACAGATTACTTTCC<br>GCGGAGCTCGTTCATCACTATCCGACAGG       | F<br>R |
| 15 | HDAC1 & Δ31; cDNA           | GCGGAATCAAGCGCAGACGCAGGG<br>GCGGGTACCGGCAACTTGACCTCCTCCTTG            | F<br>R |
| 16 | HDAC1 & Δ31; cDNA           | GCGGAATCAAGCGCAGACGCAGGG<br>GCGGAGCTCGGCAACTTGACCTCCTCCTTG            | F<br>R |
| 17 | NLuc; cDNA                  | CCCGTCGACCGAAGACGCCAAAAAC<br>CCCGCGGCCGCTCCATCTTTGCAAT                | F<br>R |
| 18 | CLuc; cDNA                  | GCGGGCCATGGAGGCCATGTCCGGT<br>GCGGAATTCGCACGGCGATCTTTCCG               | F<br>R |
| 19 | TP53; cDNA                  | CGGCCATGGAGCCGAGGAGCCGCAGTCA<br>GCGGTCGACCGTCTGAGTCAGGCCCTTCTGTG      | F<br>R |
| 20 | MDM2; cDNA                  | GCGGAATCCCGTGAGGAGCAG<br>GCGCTCGAGAGGGGAATAAGTTAGCA                   | F<br>R |
| 21 | CDK3; cDNA                  | GCGGAATCCCGATATGTTCCAGAA<br>GCGCTCGAGAATGGCGAATCGCT                   | F<br>R |
| 22 | LTR15; gDNA                 | TTGTCATTGGTTCTGTGTAGGG<br>CCTCCATATGCTGAACGCTG                        | F<br>R |
| 23 | LTR22; gDNA                 | ATGGATTACGCTGTGCTTTGGG<br>CCTCCATATGCTGAACGCTG                        | F<br>R |
| 24 | GAPDH; gDNA                 | ATGACAAGCATGAGGCAGAG<br>CAACCAGGACCGTTAACCCCTTTCT                     | F<br>R |
| 25 | HLCS; cDNA                  | ATGGAAGATAGACTCCACAT<br>TGAGACCTGATCCTTAACCTCC                        | F<br>R |
| 26 | U5; cDNA                    | AACTCAGAGGCTGGCG<br>AGACACAGAGACAAAGTATAGAGA                          | F<br>R |
| 27 | R-U5; cDNA                  | GCGGGCAGCAATACTGCTTTGTAA<br>ACCAGCGTTCAGCATATGGAGGAT                  | F<br>R |
| 28 | GAPDH; cDNA                 | TCCACTGGCGTCTTACC<br>GGCAGAGATGATGACCCTTT                             | F<br>R |
| 29 | Chr1alpha; cDNA, gDNA       | CATCGAATGGAATGAAAGGAGTC<br>ACCATTGGATGATTGCAGTCAA                     | F<br>R |
| 30 | Chr4alpha; cDNA, gDNA       | CTGCACTACCTGAAGAGGAC<br>GATGGTTCAACACTCTTACA                          | F<br>R |
